# Supplementary material
Source: publisher site journal article supplement (https://www.spandidos-publications.com/6125/downloadSupplementary)
Supplement: Supplementary file 1 [file downloadSupplementary]

## Sheet: Supplementary Table S3
Table SIV. Motifs.
No.	motif	NES	AUC	TF_HighConf	TF_LowConf	rank at max	enriched genes
1	cisbp__M6373	6.92	0.648	NFYC (directAnnotation)	E2F4; FOS; IRF3; NFYA; NFYB; PBX3; RFX5; SP1 (inferredBy_MotifSimilarity). PBX1 (inferredBy_MotifSimilarity_n_Orthology).	1053	GSK3B;HIF1A;SMAD2;SOX9
2	cisbp__M6537	6.91	0.647	YBX1 (directAnnotation)		1053	GSK3B;HIF1A;SMAD2;SOX9
3	cisbp__M2301	6.78	0.636	NFYB (directAnnotation)	E2F4; IRF3; NFYA; NFYC; RFX5; SP1 (inferredBy_MotifSimilarity). POLE3 (inferredBy_MotifSimilarity_n_Orthology).	1053	GSK3B;HIF1A;SMAD2;SOX9
4	cisbp__M1890	6.74	0.632	NFYA (directAnnotation)	E2F4; FOS; IRF3; NFYB; NFYC; YBX1 (inferredBy_MotifSimilarity). POLE3 (inferredBy_MotifSimilarity_n_Orthology).	1053	GSK3B;HIF1A;SMAD2;SOX9
5	cisbp__M6371	6.72	0.631	NFYA (directAnnotation)	CEBPZ; E2F4; FOS; FOXI1; IRF3; NFYB; NFYC; PBX3; RFX5; SP1; SREBF1; YBX1 (inferredBy_MotifSimilarity). PBX1; POLE3 (inferredBy_MotifSimilarity_n_Orthology).	1053	GSK3B;HIF1A;SMAD2;SOX9
6	cisbp__M6372	6.56	0.617	NFYB (directAnnotation)	CEBPZ; E2F4; FOS; FOXI1; IRF3; NFYA; NFYC; PBX3; RFX5; SP1; SREBF1; YBX1 (inferredBy_MotifSimilarity). PBX1; POLE3 (inferredBy_MotifSimilarity_n_Orthology).	1053	GSK3B;HIF1A;SMAD2;SOX9
7	cisbp__M6231	6.22	0.587	FOS (directAnnotation)	E2F4; FOXI1; IRF3; NFYA; NFYB; NFYC; PBX3; RFX5; SP1; TBP (inferredBy_MotifSimilarity). PBX1; POLE3 (inferredBy_MotifSimilarity_n_Orthology).	1053	GSK3B;HIF1A;SMAD2;SOX9
8	cisbp__M6240	6.12	0.579	FOXI1 (directAnnotation)	E2F4; FOS; IRF3; NFYA; NFYB; NFYC; PBX3; RFX5; SP1 (inferredBy_MotifSimilarity). PBX1; POLE3 (inferredBy_MotifSimilarity_n_Orthology).	1053	GSK3B;HIF1A;SMAD2;SOX9
9	cisbp__M6414	5.53	0.528	PBX3 (directAnnotation)	E2F4; FOS; FOXI1; IRF3; NFYA; NFYB; NFYC; RFX5; SP1; YBX1 (inferredBy_MotifSimilarity). PBX1; POLE3 (inferredBy_MotifSimilarity_n_Orthology).	1053	GSK3B;HIF1A;SMAD2;SOX9
10	cisbp__M2120	5.52	0.527		FOS; IRF3; NFYB; PBX3 (inferredBy_MotifSimilarity). HOXA6; HOXA7; HOXB6; HOXB7; HOXC6; NFYC; POLE4 (inferredBy_MotifSimilarity_n_Orthology).	4722	GSK3B;HIF1A;SMAD2;SOX9
11	cisbp__M6174	5.51	0.526	CEBPZ (directAnnotation)	IRF3; NFYA; NFYB; NFYC; RFX5 (inferredBy_MotifSimilarity). PBX1; POLE3 (inferredBy_MotifSimilarity_n_Orthology).	1053	GSK3B;HIF1A;SMAD2;SOX9
12	cisbp__M1181	5.46	0.522			4722	GSK3B;HIF1A;SMAD2;SOX9
13	cisbp__M0585	5.26	0.505			4722	GSK3B;HIF1A;SMAD2;SOX9
14	cisbp__M1172	5.16	0.496			1053	GSK3B;HIF1A;SMAD2;SOX9
15	cisbp__M1168	5.15	0.495			4722	GSK3B;HIF1A;SMAD2;SOX9
16	cisbp__M0836	5.04	0.486			4722	GSK3B;HIF1A;SMAD2;SOX9
17	cisbp__M1108	4.96	0.478			4722	GSK3B;HIF1A;SMAD2;SOX9
18	cisbp__M1169	4.9	0.474			4722	GSK3B;HIF1A;SMAD2;SOX9
19	cisbp__M1209	4.88	0.472			4722	GSK3B;HIF1A;SMAD2;SOX9
20	cisbp__M0848	4.79	0.464			4722	GSK3B;HIF1A;SMAD2;SOX9
21	cisbp__M4473	4.79	0.464	PBX3 (directAnnotation)	E2F4; FOS; FOXI1; IRF3; NFYA; NFYB; NFYC; RFX5; SP1; SREBF1; YBX1 (inferredBy_MotifSimilarity). PBX1 (inferredBy_MotifSimilarity_n_Orthology).	1053	GSK3B;HIF1A;SMAD2;SOX9
22	cisbp__M0830	4.78	0.464			4722	GSK3B;HIF1A;SMAD2;SOX9
23	cisbp__M2119	4.59	0.447	NFYB; POLE3 (inferredBy_Orthology)	FOS; FOXI1; IRF3; NFYA; NFYC; RFX5; SP1 (inferredBy_MotifSimilarity). PBX1 (inferredBy_MotifSimilarity_n_Orthology).	1053	GSK3B;HIF1A;SMAD2;SOX9
24	cisbp__M6043	4.58	0.446		ALX3; EMX1; EMX2; EN1; EN2; ESX1; GBX1; GBX2; HOXD1; ISX; LHX4; LHX6; LHX8; LHX9; MIXL1; NOTO; PRRX1; PRRX2; RAX2; SHOX; SHOX2; TLX2; UNCX; VAX1; VAX2; VSX1 (inferredBy_MotifSimilarity). ARX; LBX1; LHX3; MNX1; NOBOX; RAX (inferredBy_MotifSimilarity_n_Orthology).	4722	GSK3B;HIF1A;SMAD2;SOX9
25	cisbp__M2121	4.53	0.442	NFYC; POLE4 (inferredBy_Orthology)	FOS; IRF3; NFYB; PBX3; RFX5 (inferredBy_MotifSimilarity).	4722	GSK3B;HIF1A;SMAD2;SOX9
26	cisbp__M1038	4.43	0.433	DUXB (inferredBy_Orthology).		4722	GSK3B;HIF1A;SMAD2;SOX9
27	cisbp__M4741	4.32	0.424	LHX2; LHX9 (inferredBy_Orthology).		4722	GSK3B;HIF1A;SMAD2;SOX9
28	cisbp__M0831	4.24	0.417			4722	GSK3B;HIF1A;SMAD2;SOX9
29	cisbp__M0890	4.18	0.411	LHX6 (directAnnotation)		4722	GSK3B;HIF1A;SMAD2;SOX9
30	cisbp__M1037	4.16	0.41	DUXB (inferredBy_Orthology).	DUXA (inferredBy_MotifSimilarity).	4722	GSK3B;HIF1A;SMAD2;SOX9
31	cisbp__M0962	3.95	0.392	LHX6 (inferredBy_Orthology)	LHX4 (inferredBy_MotifSimilarity). EN1; EN2; HOXA1; HOXA6; HOXA7; HOXB6; HOXB7; HOXC6; VAX1; VAX2 (inferredBy_MotifSimilarity_n_Orthology).	4722	GSK3B;HIF1A;SMAD2;SOX9
32	cisbp__M5395	3.88	0.386	EN2 (directAnnotation)	BSX; EMX1; EMX2; EN1; ESX1; GBX1; GBX2; HOXA1; HOXA2; LBX2; LHX4; MSX1; MSX2; NOTO; PHOX2B; PRRX1; PRRX2; TLX2; VAX1 (inferredBy_MotifSimilarity). BARHL1; BARHL2; EVX1; EVX2; HOXA6; HOXA7; HOXB6; HOXB7; HOXC6; HOXD3; ISX; LBX1; MNX1; NKX1-1; NKX1-2; RAX; UNCX; VSX2 (inferredBy_MotifSimilarity_n_Orthology).	4722	GSK3B;HIF1A;SMAD2;SOX9
33	cisbp__M0853	3.84	0.383			4722	GSK3B;HIF1A;SMAD2;SOX9
34	cisbp__M5102	3.84	0.382	SMAD4 (inferredBy_Orthology).		4722	GSK3B;HIF1A;HSPA4;SMAD2
35	cisbp__M0608	3.7	0.37	KMT2A (directAnnotation).		4722	GSK3B;HSPA4;SMAD2;SOX9
36	cisbp__M5158	3.65	0.366	PAX1; PAX9 (inferredBy_Orthology).	PAX5 (inferredBy_MotifSimilarity).	278	GSK3B;SMAD2
37	cisbp__M5392	3.62	0.363	EN1 (directAnnotation)	ALX3; BSX; EMX1; EMX2; EN2; ESX1; EVX2; GBX1; GBX2; GSX2; HOXB2; ISX; LBX2; LHX4; LHX8; LHX9; MNX1; MSX1; MSX2; NOTO; PDX1; PHOX2B; PRRX1; PRRX2; RAX2; SHOX; SHOX2; TLX2; VAX1; VAX2; VSX1; VSX2; ZBTB49 (inferredBy_MotifSimilarity). ARX; DLX1; DLX4; DLX6; EVX1; HOXA6; HOXA7; HOXB6; HOXB7; HOXC6; HOXD3; LBX1; LHX3; LHX6; NKX1-2; RAX; UNCX (inferredBy_MotifSimilarity_n_Orthology).	4722	GSK3B;HIF1A;SMAD2;SOX9
38	cisbp__M1081	3.58	0.36			4722	GSK3B;HIF1A;SMAD2;SOX9
39	cisbp__M3311	3.57	0.359	GATA1 (directAnnotation).		278	SMAD2;SOX9
40	cisbp__M1774	3.57	0.359			4722	GSK3B;HIF1A;HSPA4;SMAD2
41	cisbp__M5926	3.57	0.359	TFAP4 (directAnnotation)		278	HIF1A;SOX9
42	cisbp__M1742	3.57	0.359			4722	GSK3B;HIF1A;HSPA4;SMAD2;SOX9
43	cisbp__M2944	3.56	0.358	TFAP4 (directAnnotation)		278	HIF1A;SOX9
44	cisbp__M1753	3.53	0.355			4722	GSK3B;SMAD2;SOX9
45	cisbp__M0969	3.53	0.355		EMX1; EMX2; EN1; GBX2; HOXA1; LHX6; LHX8; PDX1; VENTX; ZBTB49 (inferredBy_MotifSimilarity). EN2; HOXD3; ISX; NKX1-2; PHOX2A; RAX (inferredBy_MotifSimilarity_n_Orthology).	4722	GSK3B;HIF1A;SMAD2;SOX9
46	cisbp__M1705	3.51	0.354			1053	GSK3B;SMAD2;SOX9
47	cisbp__M0038	3.5	0.353			4722	GSK3B;HIF1A;SOX9
48	cisbp__M1160	3.45	0.349		EMX1; EMX2; EN1; GBX2; LHX6; LHX8; MSX2; PDX1; VENTX; ZBTB49; ZFHX3 (inferredBy_MotifSimilarity). EN2; HOXD3; NKX1-2; RAX (inferredBy_MotifSimilarity_n_Orthology).	4722	GSK3B;HIF1A;SMAD2;SOX9
49	cisbp__M2266	3.44	0.348	BHLHE40 (inferredBy_Orthology).		278	HIF1A;SMAD2
50	cisbp__M2342	3.44	0.348			4722	HIF1A;SMAD2;SOX9
51	cisbp__M5927	3.43	0.347	TFAP4 (directAnnotation)	MSC; MYOD1 (inferredBy_MotifSimilarity). MYF5; MYF6; MYOG; TCF21 (inferredBy_MotifSimilarity_n_Orthology).	278	HIF1A;SOX9
52	cisbp__M2234	3.41	0.345			4722	GSK3B;HIF1A;HSPA4;SMAD2;SOX9
53	cisbp__M1994	3.39	0.344	DEAF1 (inferredBy_Orthology).		4722	GSK3B;SMAD2;SOX9
54	cisbp__M2181	3.38	0.343	MIOS (inferredBy_Orthology)	BHLHE40; MLX (inferredBy_MotifSimilarity).	4722	HIF1A;HSPA4;SMAD2
55	cisbp__M2957	3.33	0.338	ARNT (directAnnotation)	ARNTL; ATF3; BACH1; BHLHE40; BHLHE41; CLOCK; MITF; MLX; MLXIPL; SREBF1; SREBF2; TFE3; TFEB; TFEC; USF1; USF2 (inferredBy_MotifSimilarity). ARNTL2; HELT (inferredBy_MotifSimilarity_n_Orthology).	4722	HIF1A;HSPA4;SMAD2
56	cisbp__M1573	3.29	0.335	SMAD3 (inferredBy_Orthology).		4722	GSK3B;HIF1A;HSPA4;SOX9
57	cisbp__M5188	3.29	0.335		GFI1 (inferredBy_MotifSimilarity). GFI1B (inferredBy_MotifSimilarity_n_Orthology).	1053	GSK3B;SOX9
58	cisbp__M2350	3.28	0.334			4722	HIF1A;HSPA4;SMAD2;SOX9
59	cisbp__M0017	3.27	0.333		ZMIZ1 (inferredBy_MotifSimilarity).	4722	GSK3B;HIF1A;HSPA4;SMAD2
60	cisbp__M5288	3.27	0.333	AR (directAnnotation)	NR3C1; NR3C2 (inferredBy_MotifSimilarity).	1053	GSK3B;HSPA4
61	cisbp__M1721	3.27	0.333			4722	GSK3B;HSPA4;SOX9
62	cisbp__M1729	3.24	0.331			1053	GSK3B;SMAD2;SOX9
63	cisbp__M6557	3.24	0.33	ZNF384 (directAnnotation).		4722	GSK3B;HIF1A;HSPA4
64	cisbp__M0228	3.23	0.33		TFAP4 (inferredBy_MotifSimilarity).	1053	HIF1A;SOX9
65	cisbp__M1880	3.23	0.33	NHLH1 (directAnnotation).	NHLH2 (inferredBy_MotifSimilarity).	4968	HIF1A;HSPA4;SOX9
66	cisbp__M5225	3.23	0.33			4722	GSK3B;HIF1A;SMAD2
67	cisbp__M2337	3.23	0.329			4722	GSK3B;HIF1A;HSPA4;SMAD2
68	cisbp__M0619	3.22	0.329			4722	GSK3B;HSPA4;SMAD2;SOX9
69	cisbp__M3628	3.22	0.329	NFYA (directAnnotation)	FOXI1; IRF3; NFYB; NFYC (inferredBy_MotifSimilarity). PBX1 (inferredBy_MotifSimilarity_n_Orthology).	4722	GSK3B;HIF1A;SMAD2;SOX9
70	cisbp__M5671	3.14	0.322	NHLH1 (directAnnotation).	NHLH2 (inferredBy_MotifSimilarity).	1053	HIF1A;SOX9
71	cisbp__M4899	3.14	0.322	TFAP4 (inferredBy_Orthology).		1053	HIF1A;SOX9
72	cisbp__M0448	3.09	0.318		OVOL2 (inferredBy_MotifSimilarity).	4722	GSK3B;HIF1A;HSPA4;SMAD2
73	cisbp__M0675	3.09	0.317			4722	GSK3B;HIF1A;HSPA4;SMAD2;SOX9
74	cisbp__M1832	3.08	0.316			1053	GSK3B;SMAD2;SOX9
75	cisbp__M5985	3.07	0.316	AR (inferredBy_Orthology)	NR3C1; NR3C2 (inferredBy_MotifSimilarity).	1053	GSK3B;HSPA4
76	cisbp__M2285	3.06	0.315	GFI1B (inferredBy_Orthology).	GFI1 (inferredBy_MotifSimilarity).	1053	GSK3B;SOX9
77	cisbp__M0874	3.06	0.315		DUXB (inferredBy_MotifSimilarity_n_Orthology).	4722	GSK3B;HIF1A;SMAD2;SOX9
78	cisbp__M0035	3.06	0.315			1053	GSK3B;HIF1A
79	cisbp__M3341	3.03	0.312	GFI1 (directAnnotation)	GFI1B (inferredBy_MotifSimilarity).	1053	GSK3B;SOX9
80	cisbp__M1202	3	0.31		SHOX (inferredBy_MotifSimilarity). EN1; GBX1; GBX2; HOXD1 (inferredBy_MotifSimilarity_n_Orthology).	4722	GSK3B;SMAD2;SOX9
